# Supplementary material
Source: PubMed Central journal article supplement (PMC7756772)
Supplement: FSB2-34-16693-s003.pdf [file FSB2-34-16693-s003.pdf]

# Supplementary Figure 3

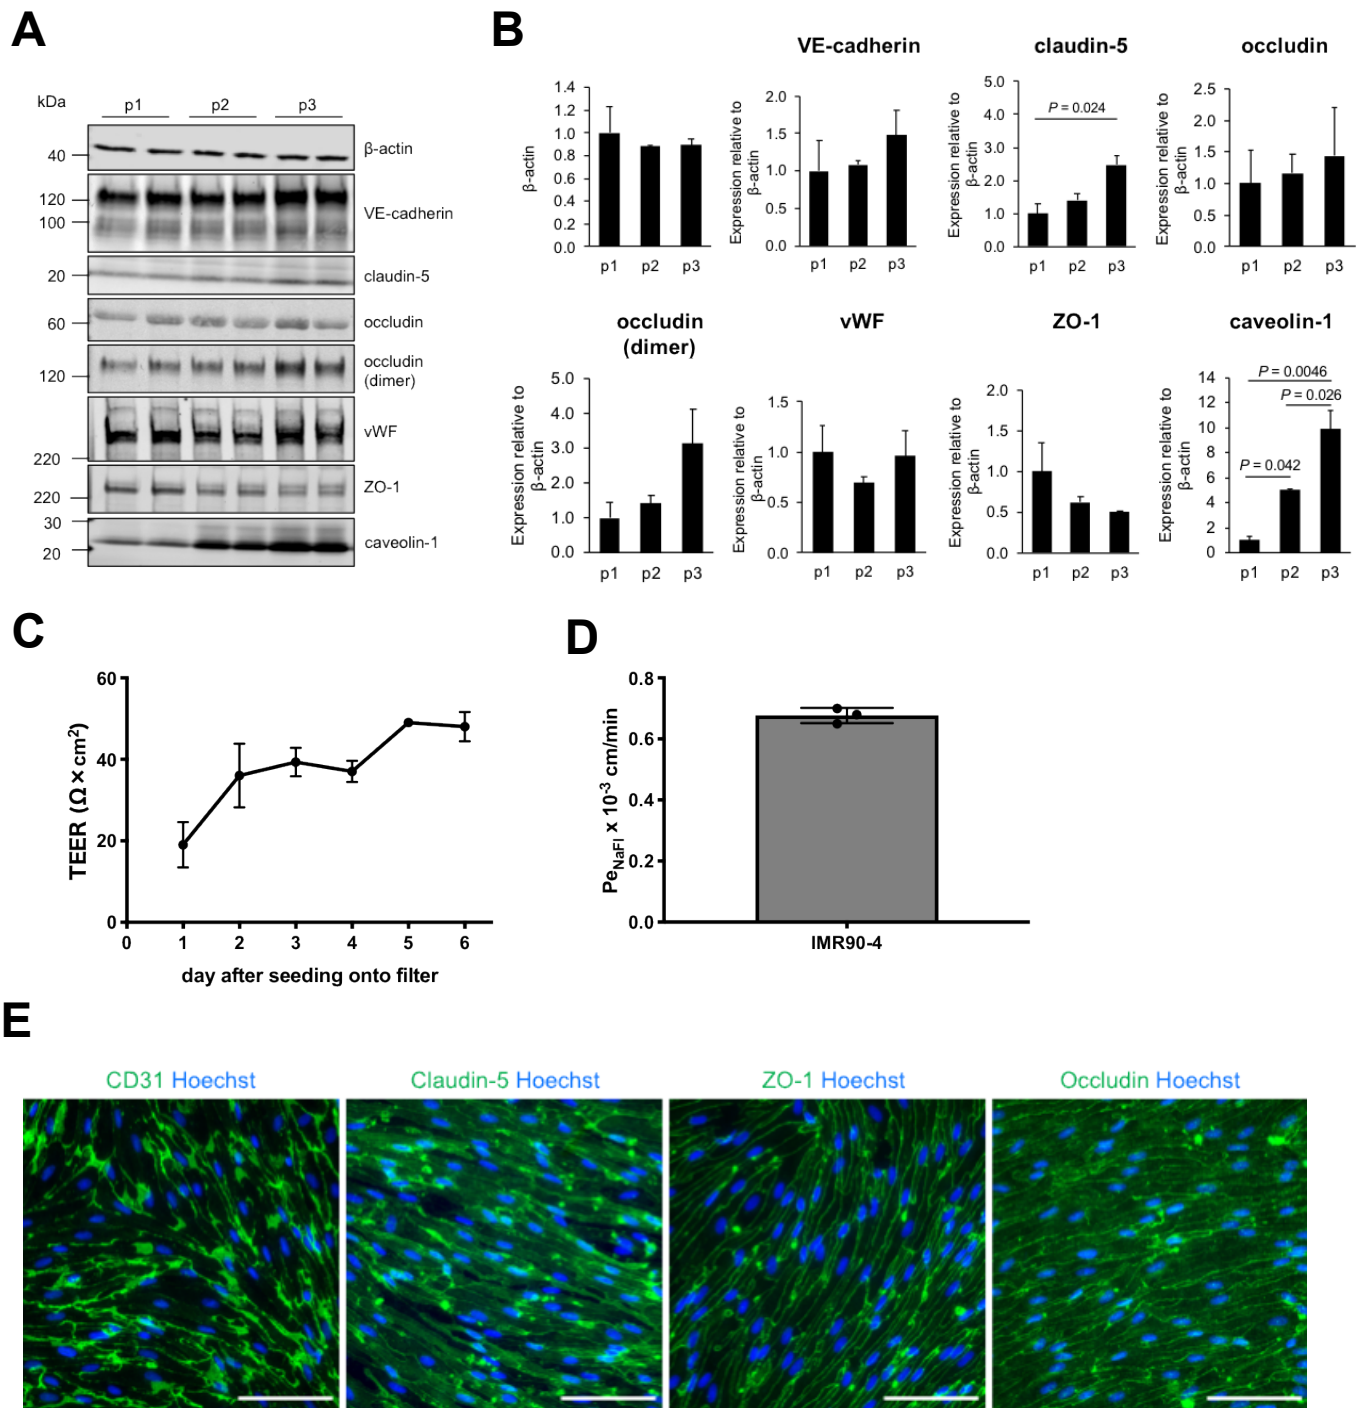

**Supplementary Figure 3. Western blot analysis of naive ECs and EECM-BMEC-like cells and barrier characteristics of EECM-BMEC-like cells from an hiPSC line originating from fibroblasts.**

(A) Western blots of naive EC (passage 1, p1) and EECM-BMEC-like cells (passage 2 and 3, p2 and p3) probed for  $\beta$ -actin, VE-cadherin, claudin-5, occludin, vWF, ZO-1, and caveolin-1. (B) Quantification of Western blot band intensity. Data are shown as the mean  $\pm$  SD of two wells from one differentiation of the IMR90-4 hiPSC line. Statistical analysis: one-way ANOVA followed by Tukey's multiple comparison test. (C, D) TEER (C) and permeability to sodium fluorescein (D) of EECM-BMEC-like cell monolayers from IMR90-4 hiPSC line is shown. EECM-BMEC-like cells were seeded onto 0.4  $\mu\text{m}$  pore size Transwell filters as monoculture and TEER were measured over 6 days and PeNaFl was measured at day 6. (C) Plotted data are mean TEER values  $\pm$  SD. (D) Bars show the mean permeability coefficients (Pe)  $\pm$  SD. (E) Immunofluorescence images of EECM-BMEC-like cells from IMR90-4 hiPSC line grown on 0.4  $\mu\text{m}$  pore Transwell filters. Cell junctions were stained for CD31 (green), claudin-5 (green), zonula occludens 1 (ZO-1, green), occludin (green) and nuclei were stained with Hoechst (blue). Scale bars = 100  $\mu\text{m}$ .
