# Supplementary material
Source: PubMed Central journal article supplement (PMC7756772)
Supplement: FSB2-34-16693-s004.pdf [file FSB2-34-16693-s004.pdf]

# Supplementary Figure 4

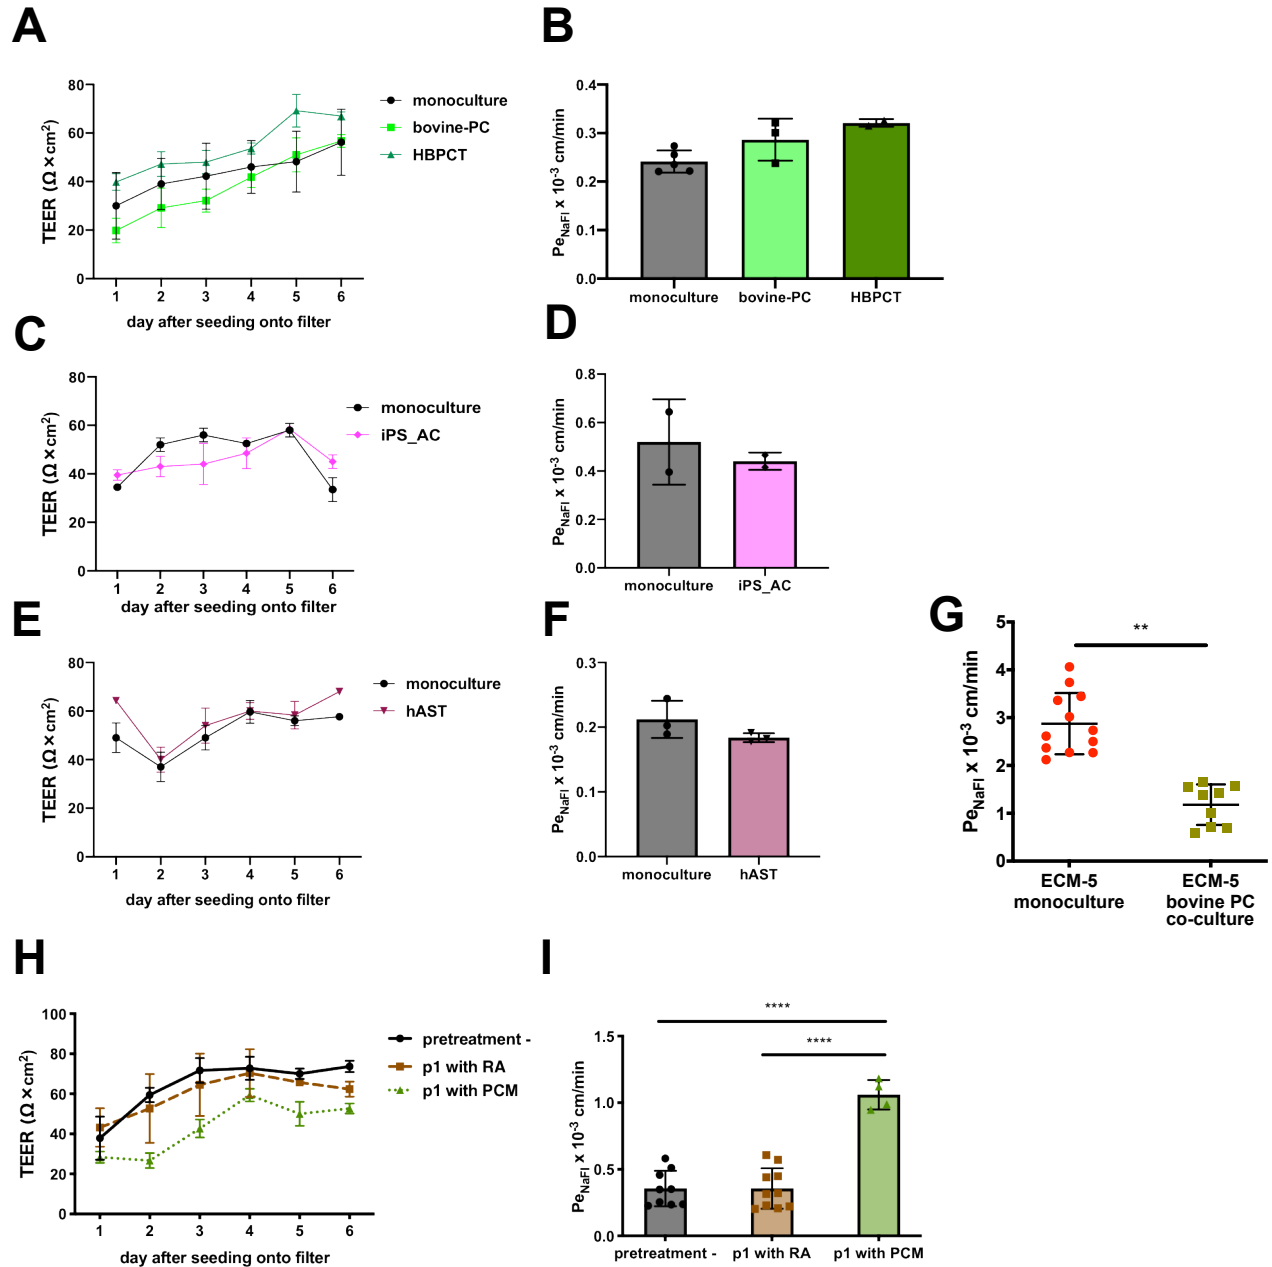

**Supplementary Figure 4. The effect of astrocyte or pericyte co-culture and ECM-5 medium on barrier characteristics of EECM-BMEC-like cell monolayers from additional hiPSC clones and the effect of RA pretreatment or pericyte conditioned medium on EPCs.**

TEER (A, C, E) and permeability to sodium fluorescein (B, D, F, G) of EECM-BMEC-like cell monolayers is shown. EECM-BMEC-like cells were seeded onto 0.4  $\mu\text{m}$  pore size Transwell filters and co-cultured for 6 days with bovine pericytes (bovine PC; A and B, light green), a human brain pericyte cell line (HBPCT) (A and B, dark green), a human astrocyte cell line (hAST) (C and D, dark red), hiPSC-derived astrocytes (iPS\_AC) (E and F, pink). Monoculture condition was used as a control (black). (A, C, E) Plotted data are mean TEER values  $\pm$  SD. (B, D, F) Bars show the mean permeability coefficients ( $P_e$ )  $\pm$  SD. (A-E) Representative data from donor 1 are shown. At least 2 independent differentiations performed on 2 distinct filters were used in this study. (G) Permeability of sodium fluorescein of EECM-BMEC-like cell monolayers cultivated in ECM-5 medium in the presence and absence of bovine pericytes. EECM-BMEC-like cells from donor 2 (passage 3-5) were seeded onto 0.4  $\mu\text{m}$  pore size Transwell filters and co-cultured for 6 days with bovine pericytes. Monoculture condition using ECM-5 medium was used as a control (black). Bars show the mean permeability coefficients ( $P_e$ )  $\pm$  SD. Data are overlaid from at least 3 independent differentiations each performed in triplicate per conditions. Statistical analysis: unpaired t-test ( $P < 0.01 = **$ ) (H) TEER and (I) permeability of sodium fluorescein of EECM-BMEC-like cells from donor 2 at passage 2 are shown. EPCs (after EPC purification by MACS) were cultured in the presence or absence of RA for 3 days (brown) or bovine pericyte conditioned medium (PCM) for 6 days (green) and then EECM-BMEC-like cells at passage 2 were cultured on 0.4  $\mu\text{m}$  pore size Transwell filters over 6 days. Data are from 3 independent differentiations for RA treatment each performed in at least triplicate, and from 2 independent differentiations for PCM condition each performed in duplicate. Statistical analysis: one-way ANOVA followed by Tukey's multiple comparison test. ( $p < 0.0001 = ****$ ).
