# Supplementary material
Source: PubMed Central journal article supplement (PMC7756772)
Supplement: FSB2-34-16693-s005.pdf [file FSB2-34-16693-s005.pdf]

# Supplementary Figure 5

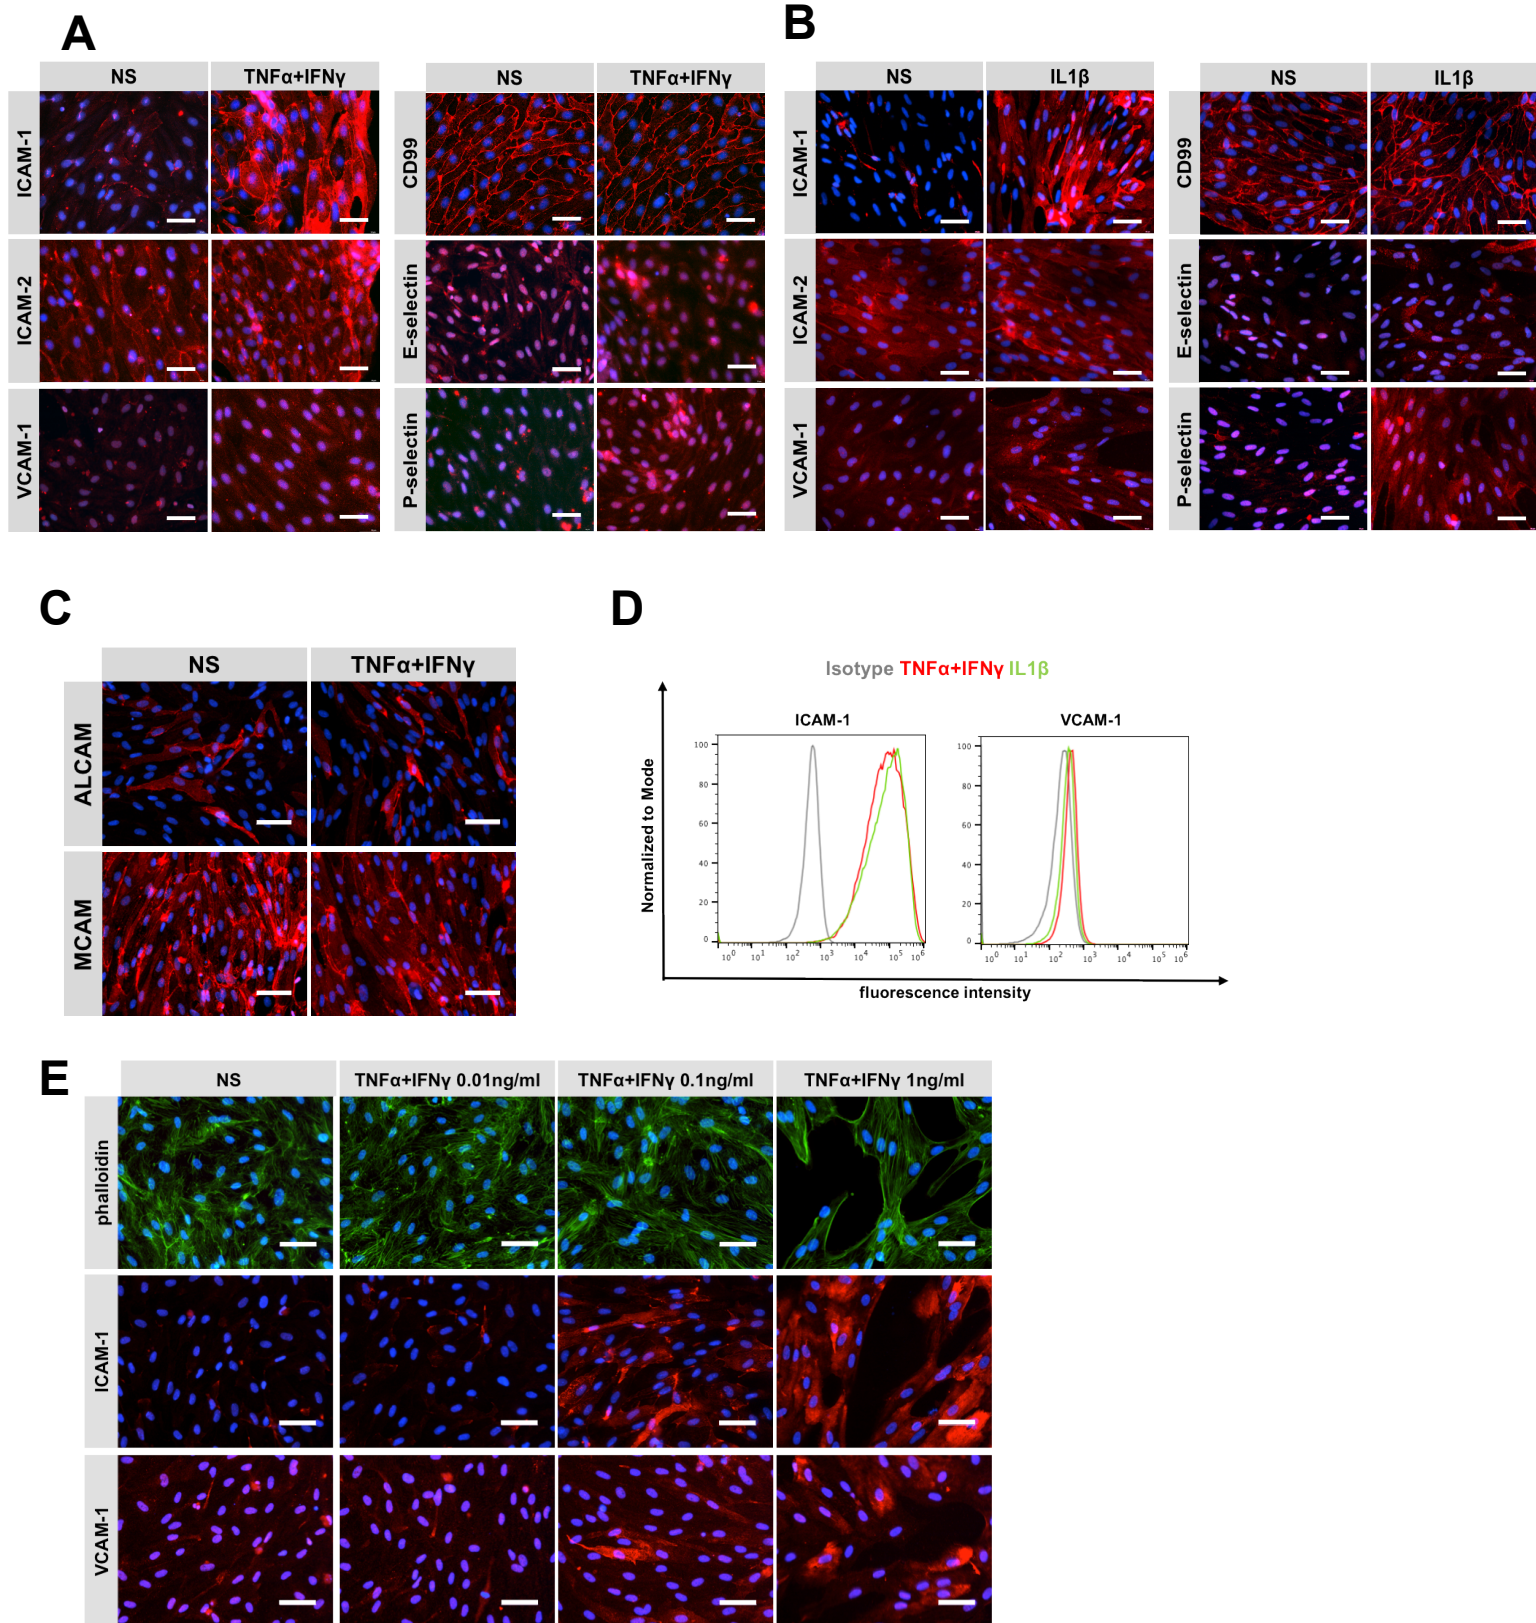

## Supplementary Figure 5. Adhesion molecule phenotype of stimulated and control EECM-BMEC-like cells from additional hiPSC clones.

(A-C) Immunofluorescence staining of EECM-BMEC-like cells from donor 3 seeded in a chamber slide for ICAM-1 (red), ICAM-2 (red), VCAM-1 (red), P-selectin (red), E-selectin (red), CD99 (red), ALCAM (red), or MCAM (red). Nuclei were stained with DAPI (blue). NS and 0.1 ng/mL TNF- $\alpha$  + 2 IU/mL IFN- $\gamma$ - (A and C) or 0.1 ng/mL IL-1 $\beta$ - (B) stimulated conditions are shown. Scale bars = 50  $\mu$ m. Each staining is representative of at least 3 independent differentiations performed on 3 distinct chamber slides. (D) Cell surface staining of EECM-BMEC-like cell monoculture for the adhesion molecules ICAM-1, VCAM-1, was analyzed by flow cytometry. Isotype control and 16 h pro-inflammatory cytokine-stimulated condition (1 ng/mL TNF- $\alpha$  + 20 IU/mL IFN- $\gamma$  or 1 ng/mL IL-1 $\beta$ ) are represented respectively in grey, red, and green lines in a histogram overlay. Representative data from donor 2 are shown. (E) Immunofluorescence staining of EECM-BMEC-like cells from donor 2 seeded in a chamber slide for phalloidin (green), ICAM-1 (red), and VCAM-1 (red) is shown. Nuclei were stained with DAPI (blue). NS and different concentrations of TNF- $\alpha$  + IFN- $\gamma$ - stimulated conditions are shown. Scale bars = 50  $\mu$ m. Each staining is representative of at least 3 independent differentiations performed on 3 distinct chamber slides.
