# Supplementary material
Source: PubMed Central journal article supplement (PMC7756772)
Supplement: FSB2-34-16693-s006.pdf [file FSB2-34-16693-s006.pdf]

# Supplementary Figure 6

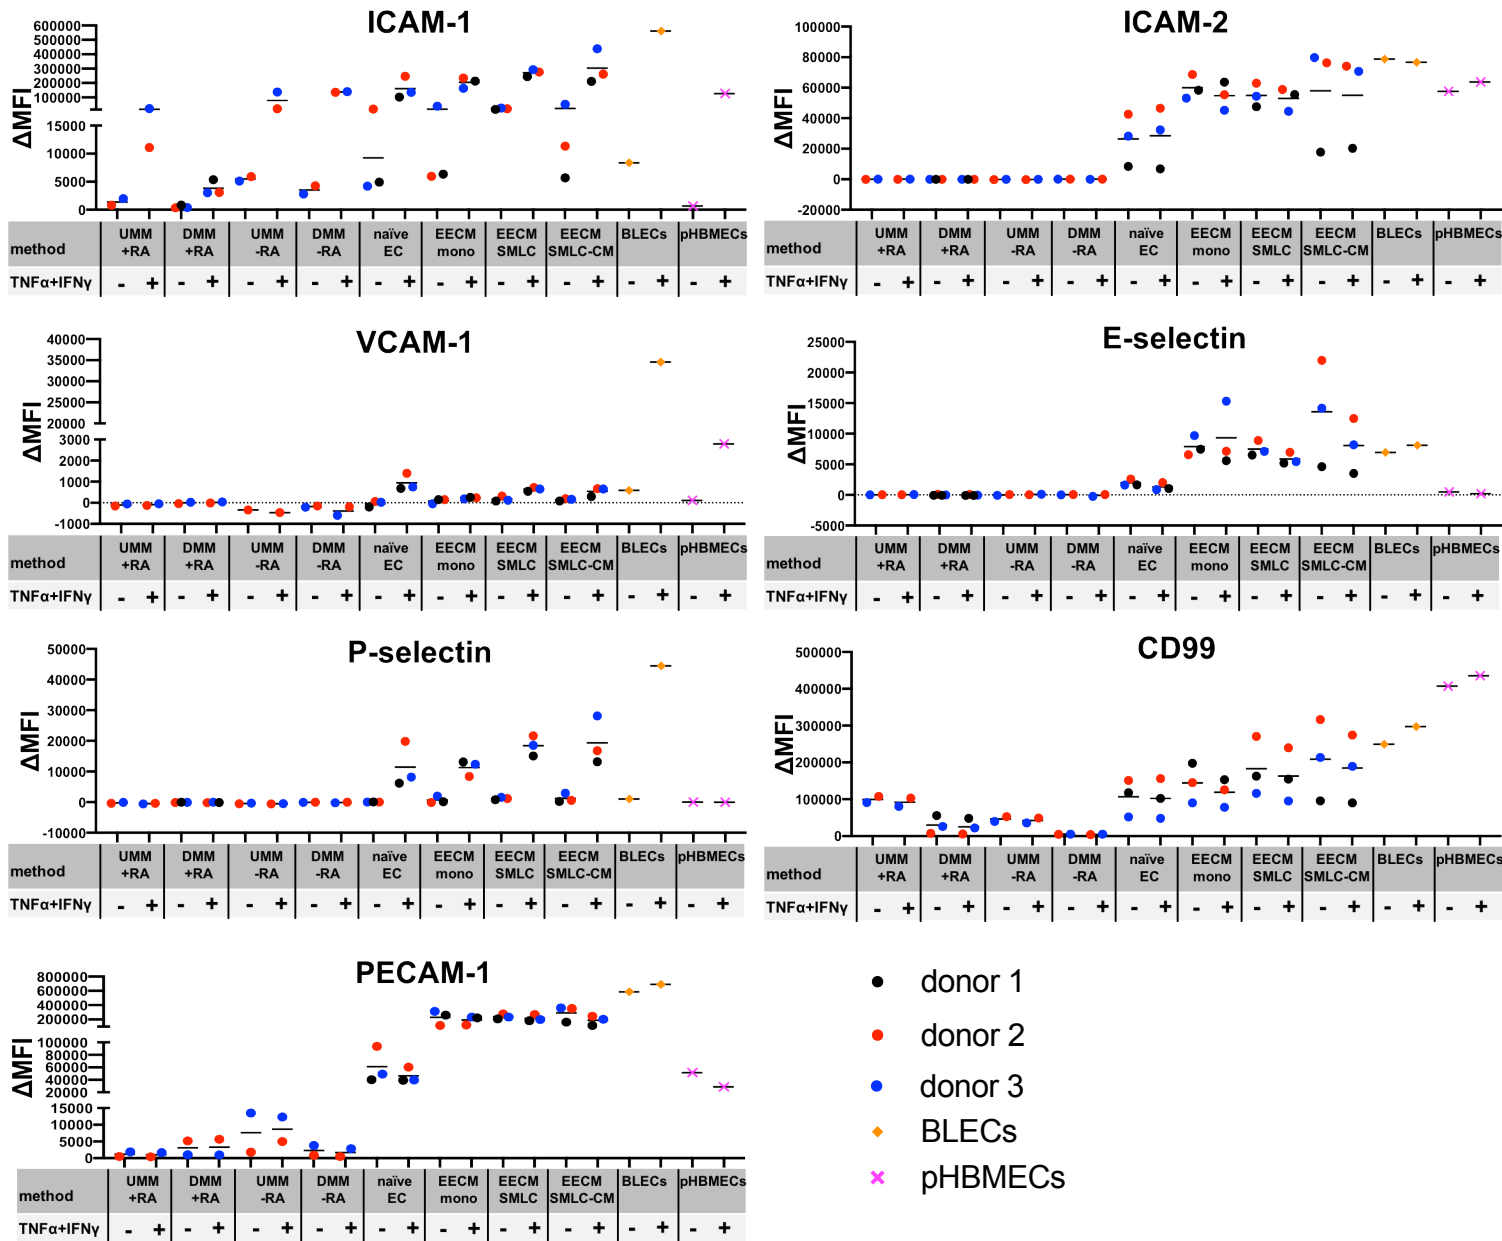

## Supplementary Figure 6. Cell surface expression of adhesion molecules on different human *in vitro* BBB models

The  $\Delta$  geometric mean (MFI staining – MFI isotype) of cell surface staining for adhesion molecules on different human *in vitro* BBB models were analyzed by flow cytometry. Each symbol shows results from different donor (donor 1: black, donor 2: red, donor 3: blue). Human CD34+ cord-blood stem cell-derived brain like endothelial cells (BLECs, orange) and primary human brain microvascular endothelial cells (pHBMECs, magenta) were used for a comparison to DMM-BMECs, UMM-BMECs and EECM-BMECs. Data for naïve ECs are also shown.
