# Supplementary material
Source: PubMed Central journal article supplement (PMC7756772)
Supplement: FSB2-34-16693-s007.pdf [file FSB2-34-16693-s007.pdf]

# Supplementary Figure 7

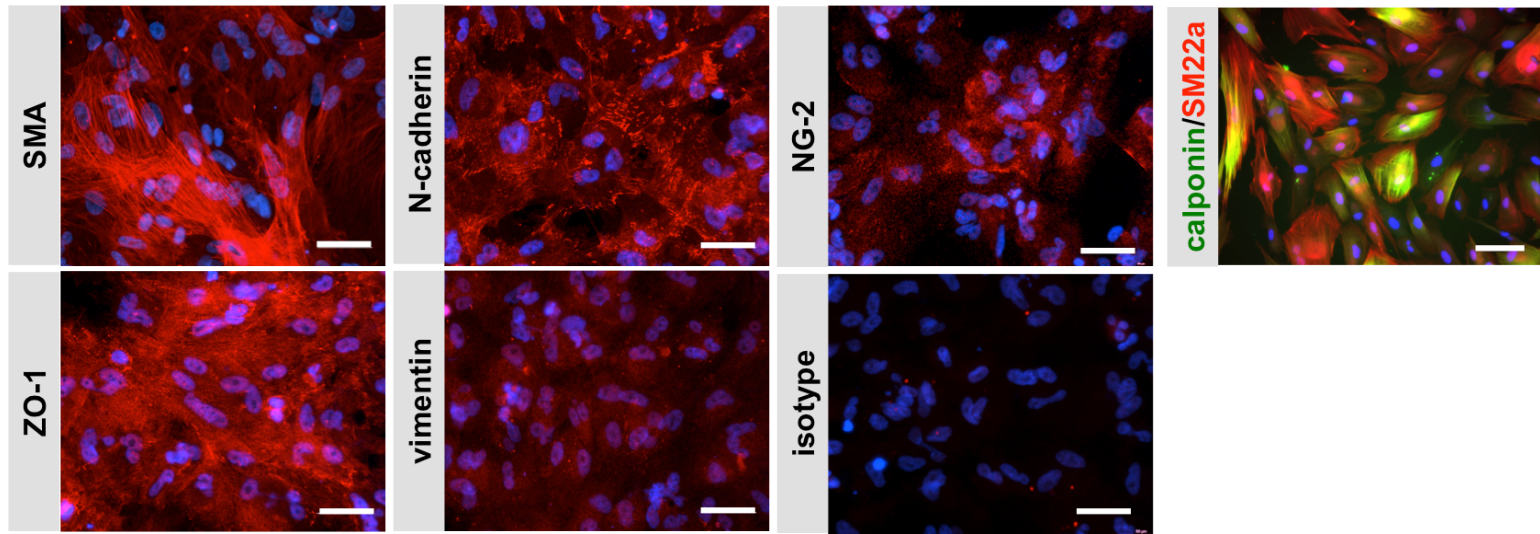

## Supplementary Figure 7. Immunofluorescence staining of hiPSCs-derived smooth muscle-like cells (SMLCs)

Immunofluorescence staining of hiPSC-derived smooth muscle-like cells (SMLCs) from donor 2 seeded in a chamber slide for  $\alpha$ -smooth muscle actin (SMA), N-cadherin, NG-2, ZO-1, or Vimentin, or from the IMR90-4 line stained for calponin (green) and SM22 $\alpha$  (red). Nuclei were stained with DAPI (blue). Scale bars = 50  $\mu$ m. Each staining is representative of at least 3 independent differentiations performed on 3 distinct chamber slides.
