# Supplementary material
Source: PubMed Central journal article supplement (PMC7756772)
Supplement: FSB2-34-16693-s009.pdf [file FSB2-34-16693-s009.pdf]

# Supplementary Figure 9

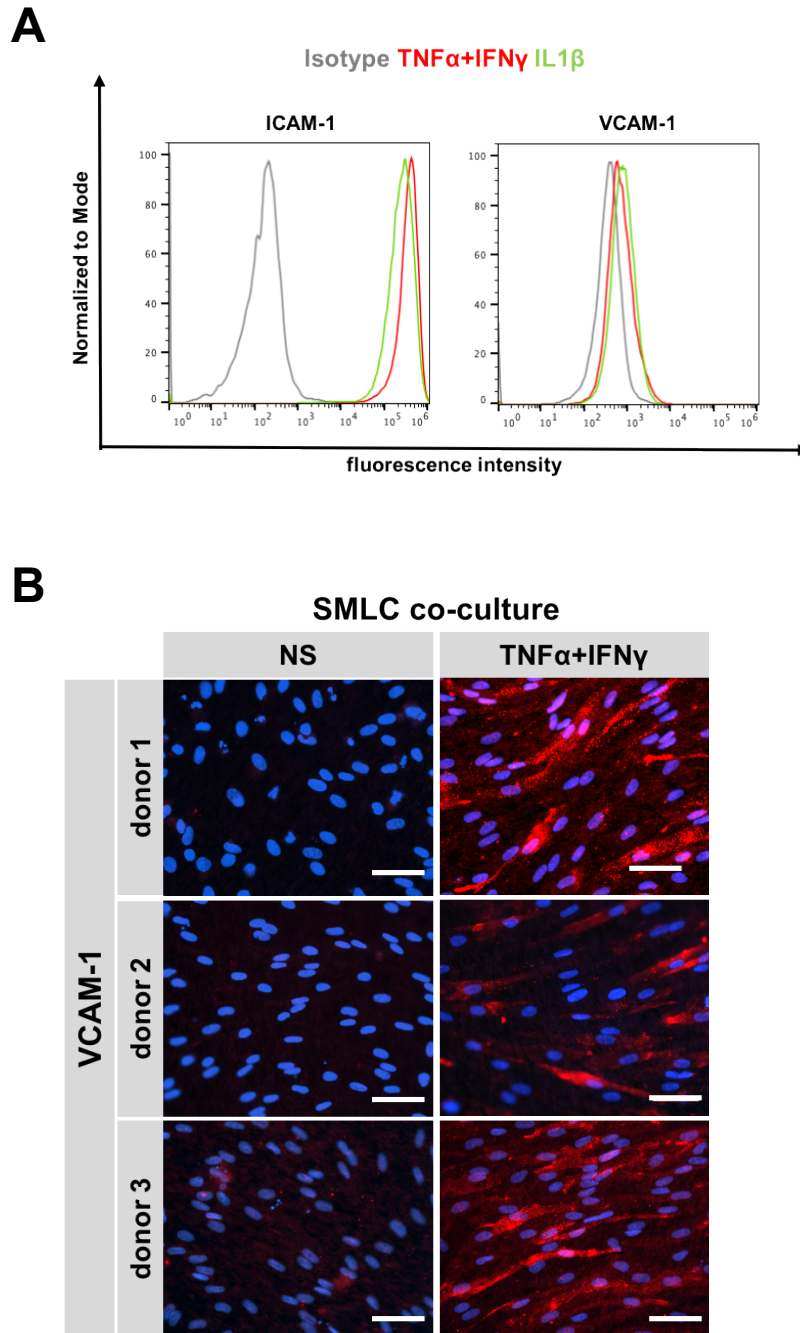

## Supplementary Figure 9. Adhesion molecule phenotype of stimulated and control EECM-BMEC-like cells from additional hiPSC clones.

(A) Cell surface staining of EECM-BMEC-like cells with SMLC co-culture for the adhesion molecules ICAM-1, VCAM-1, was analyzed by flow cytometry. Isotype control and 16 h pro-inflammatory cytokine-stimulated condition (1 ng/mL  $TNF-\alpha$  + 20 IU/mL  $IFN-\gamma$  or 1ng/mL  $IL-1\beta$ ) are represented respectively in grey, red, and green lines in a histogram overlay. Representative data from donor 3 are shown. (B) Immunofluorescence staining of EECM-BMEC-like cells grown on 0.4  $\mu$  m pore size Transwell filters and co-cultured with SMLCs for VCAM-1 (red) are shown. Nuclei were stained with DAPI (blue). NS and 16 h pro-inflammatory cytokine-stimulated condition (1 ng/mL  $TNF-\alpha$  + 20 IU/mL  $IFN-\gamma$ ) are shown. Representative image from each donor (donor 1, 2, 3) are shown. Each staining is representative of at least 3 independent differentiations performed on 3 distinct chamber slides. Scale bars = 50  $\mu$ m.
