# Supplementary material
Source: PubMed Central journal article supplement (PMC7756772)
Supplement: FSB2-34-16693-s010.pdf [file FSB2-34-16693-s010.pdf]

**Supplementary Table 1. Seeding densities of hiPSCs clones time until confluency employing the extended endothelial cell culture method (EECM)**

| Clone name | UMM<br>(/cm <sup>2</sup> ) | DMM<br>(/cm <sup>2</sup> ) | EECM<br>(/cm <sup>2</sup> ) | Average range of time for become<br>confluent in EECM (day) |
|------------|----------------------------|----------------------------|-----------------------------|-------------------------------------------------------------|
| Donor 1    | 21,000                     | 150,000                    | 100,000                     | 5-7                                                         |
| Donor 2    | 10,000                     | 36,000                     | 26,000                      | 3-5                                                         |
| Donor 3    | 10,000                     | 36,000                     | 21,000                      | 3-5                                                         |
| IMR90-4    | 10,000                     | 36,000                     | 20,000                      | 4-8                                                         |

**Supplementary Table 2. Material list for EECM-BMEC-like cell protocol**

| Material                                    | Company                      | Catalog Number |
|---------------------------------------------|------------------------------|----------------|
| ROCK inhibitor Y-27632                      | Tocris                       | 1254           |
| Human fibroblast growth factor 2            | Tocris                       | 233-FB-500     |
| Accutase                                    | Innovative Cell Technologies | AT104-500      |
| CHIR99021                                   | Selleckchem                  | S1263          |
| 40µmFalcon cell strainer                    | Falcon                       | 352340         |
| CD31-FITC antibody (clone AC390)            | Miltenyi Biotec              | 130-110-668    |
| L-ascorbic acid                             | Sigma                        | A4403-5G       |
| EasySepFITC Positive Selection Kit          | Stemcell Technologies        | #18558         |
| EasySepMagnet                               | Stemcell Technologies        | #18000         |
| advanced DMEM/F-12                          | Life Technologies            | 12634          |
| Human endothelial serum-free medium (hESFM) | Thermo Fisher                | 11111-044      |
| B27, 50×                                    | Thermo Fisher                | 17504044       |
| Water, sterile, cell culture                | Sigma                        | W3500          |
| Collagen IV from human placenta             | Sigma                        | C5533          |
| Fibronectin from bovine plasma              | Sigma                        | F1141          |
