# Supplementary material
Source: PubMed Central journal article supplement (PMC7756772)
Supplement: FSB2-34-16693-s011.pdf [file FSB2-34-16693-s011.pdf]

**Supplementary Table 3. Fluorophore labelled antibodies and isotype controls for flow cytometry analysis**

| Antibodies             | Fluorophore | Clone     | Source         | Cat. N. | Isotype    |
|------------------------|-------------|-----------|----------------|---------|------------|
| Anti-human ICAM-1      | BV421       | HA58      | BD Biosciences | 564077  | m-IgG1, κ  |
| Anti-human ICAM-2      | PE          | CBR-IC2/2 | BD Biosciences | 558080  | m-IgG2a, κ |
| Anti-human VCAM-1      | FITC        | 51-10C9   | BD Biosciences | 551146  | m-IgG1, κ  |
| Anti-human P-selectin  | BV510       | AC1.2     | BD Biosciences | 743756  | m-IgG1, κ  |
| Anti-human E-selectin  | APC         | 68-5H11   | BD Biosciences | 551144  | m-IgG1, κ  |
| Anti-human CD99        | PE-Cy7      | 3B2/TA8   | Biolegend      | 371314  | m-IgG2a, κ |
| Anti-human PECAM-1     | APC-Cy7     | WM59      | BD Biosciences | 563653  | m-IgG1, κ  |
| Anti-human VE-cadherin | PerCP/Cy5.5 | 55-7H1    | BD Biosciences | 561566  | m-IgG1, κ  |

| Isotype controls | Fluorophore | Clone    | Source         | Cat. N.    |
|------------------|-------------|----------|----------------|------------|
| m-IgG1, κ        | APC         | MOPC-21  | BD Biosciences | 555751     |
| m-IgG1, κ        | BV421       | X40      | BD Biosciences | 562438     |
| m-IgG2a, κ       | PE          | eBM2a    | Invitrogen     | 12-4724-42 |
| m-IgG1, κ        | FITC        | MOPC-21  | Biolegend      | 400108     |
| m-IgG1, κ        | BV510       | X40      | BD Biosciences | 562946     |
| m-IgG2a, κ       | PE-Cy7      | MOPC-173 | Biolegend      | 400232     |
| m-IgG1, κ        | PerCP/Cy5.5 | MOPC-21  | Biolegend      | 400150     |
| m-IgG1, κ        | APC-Cy7     | MOPC-21  | BD Biosciences | 557873     |

**Supplementary Table 4. Antibody list for Western blotting**

| Antibodies  | Clone      | Source                    | Cat. N.  | Secondary Antibody                                 |
|-------------|------------|---------------------------|----------|----------------------------------------------------|
| VE-cadherin | BV9        | Santa Cruz                | sc-52751 | LI-COR IRDye 800CW Goat anti-Mouse IgG: 926-32210  |
| β-actin     | 13E5       | Cell Signaling Technology | 4970S    | LI-COR IRDye 680RD Goat anti-Rabbit IgG: 926-68071 |
| ZO-1        | polyclonal | Invitrogen                | 40-2200  | LI-COR IRDye 680RD Goat anti-Rabbit IgG: 926-68071 |
| Claudin-5   | 4C3C2      | Invitrogen                | 35-2500  | LI-COR IRDye 800CW Goat anti-Mouse IgG: 926-32210  |
| Occludin    | OC-3F10    | Invitrogen                | 33-1500  | LI-COR IRDye 800CW Goat anti-Mouse IgG: 926-32210  |
| vWF         | polyclonal | Dako                      | A0082    | LI-COR IRDye 680RD Goat anti-Rabbit IgG: 926-68071 |
| Caveolin-1  | polyclonal | Cell Signaling Technology | 3238S    | LI-COR IRDye 680RD Goat anti-Rabbit IgG: 926-68071 |
