# Supplementary material
Source: PubMed Central journal article supplement (PMC7756772)
Supplement: FSB2-34-16693-s012.pdf [file FSB2-34-16693-s012.pdf]

**Supplementary Table 5. Antibody list for immunofluorescence staining**

| Antibodies          | Fixative | Clone      | Source                             | Cat. N.  | Secondary Antibody                                                                           |
|---------------------|----------|------------|------------------------------------|----------|----------------------------------------------------------------------------------------------|
| VE-cadherin         | MeOH     | F-8        | Santa Cruz                         | sc-9989  | Cy3 AffiniPure F(ab') <sub>2</sub> Fragment Goat Anti-Mouse IgG                              |
| PECAM-1             | MeOH     | MEM-05     | Invitrogen                         | 37-0700  | Cy3 AffiniPure F(ab') <sub>2</sub> Fragment Goat Anti-Mouse IgG                              |
| ZO-1                | MeOH     | polyclonal | Invitrogen                         | 40-2200  | Cy3 AffiniPure Donkey Anti-Rabbit IgG (H+L) or Alexa Fluor™ 488 donkey anti-rabbit IgG (H+L) |
| Claudin-5           | MeOH     | 4C3C2      | Invitrogen                         | 35-2500  | Cy3 AffiniPure F(ab') <sub>2</sub> Fragment Goat Anti-Mouse IgG                              |
| Occludin            | MeOH     | OC-3F10    | Invitrogen                         | 33-1500  | Cy3 AffiniPure F(ab') <sub>2</sub> Fragment Goat Anti-Mouse IgG                              |
| ICAM-1              | live     | HA58       | Biologend                          | 353102   | Cy3 AffiniPure F(ab') <sub>2</sub> Fragment Goat Anti-Mouse IgG                              |
| ICAM-2              | live     | CBR-IC2/2  | FITZGERALD                         | 10R-7606 | Cy3 AffiniPure F(ab') <sub>2</sub> Fragment Goat Anti-Mouse IgG                              |
| VCAM-1              | live     | 51-10C9    | BD Biosciences                     | 555645   | Cy3 AffiniPure F(ab') <sub>2</sub> Fragment Goat Anti-Mouse IgG                              |
| CD99                | 1%PFA    | Hec-2      | provided from William A Muller lab |          | Cy3 AffiniPure F(ab') <sub>2</sub> Fragment Goat Anti-Mouse IgG                              |
| E-selectin          | 1%PFA    | HAE-1f     | Biologend                          | 336002   | Cy3 AffiniPure F(ab') <sub>2</sub> Fragment Goat Anti-Mouse IgG                              |
| P-selectin          | 1%PFA    | AK4        | Santa Cruz                         | sc-19996 | Cy AffiniPure F(ab') <sub>2</sub> Fragment Goat Anti-Mouse IgG                               |
| Smooth muscle actin | 1%PFA    | 1A4        | Thermo Scientific                  | MS-113-P | Alexa Fluor 488 Goat Anti-Mouse IgG                                                          |
| NG-2                | 1%PFA    | polyclonal | Millipore                          | AB5320   | Cy3 AffiniPure Donkey Anti-Rabbit IgG (H+L)                                                  |
| N-Cadherin          | MeOH     | 32         | BD Transduction Laboratories       | 610920   | Cy™ AffiniPure F(ab') <sub>2</sub> Fragment Goat Anti-Mouse IgG                              |
| Vimentin            | 1%PFA    | polyclonal | Millipore                          | AB1620   | Cy3 AffiniPure Donkey Anti-Goat IgG (H+L)                                                    |
| Calponin            | 4%PFA    | hCP        | Sigma                              | C2687    | Alexa Fluor 488 Goat Anti-Mouse IgG                                                          |
| SM22a               | 4%PFA    | polyclonal | Abcam                              | ab14106  | Alexa Fluor 647 Goat Anti-Rabbit IgG                                                         |
| MCAM                | live     | 2107       | Prothema                           | NB-0268  | Cy3 AffiniPure Goat Anti-Rat IgG (H+L)                                                       |
| ALCAM               | live     | polyclonal | R&D system                         | AF1172   | Cy3 AffiniPure Donkey Anti-Goat IgG (H+L)                                                    |
| Phalloidin          | 1%PFA    |            | Sigma                              | P5282    |                                                                                              |
